# Supplementary material for: Evidence of torpor in the tusks of Lystrosaurus from the Early Triassic of Antarctica
Source: PubMed Central journal article supplement (PMC7453012; doi:10.1038/s42003-020-01207-6), 2020-08-27
Supplement: 42003_2020_1207_MOESM1_ESM.pdf [file 42003_2020_1207_MOESM1_ESM.pdf]

## SUPPLEMENTARY FIGURES

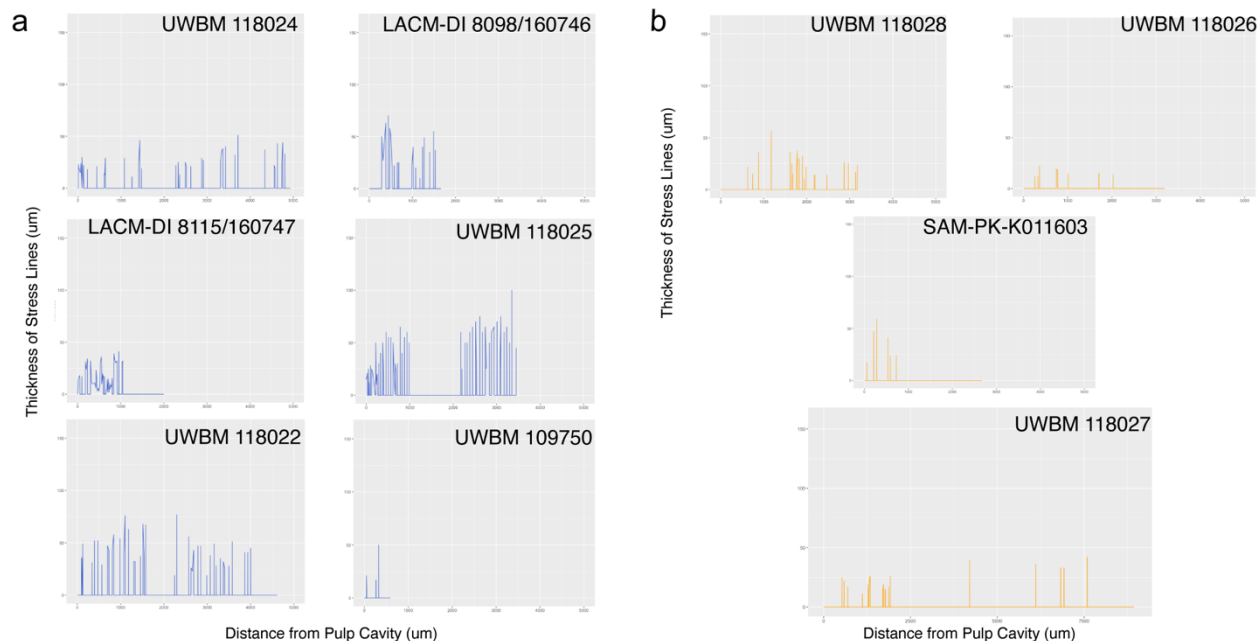

**Supplementary Figure 1.** Entire transect data on stress lines for both Antarctic (A) and South African (B) specimens to visualize patterns of stress observed along the tusk.

## SUPPLEMENTARY TABLES

**Supplementary Data Table 1. Specimen locality information.**

| Specimen Number     | Inferred Paleolatitude | Locality Description                                                                                                                         |
|---------------------|------------------------|----------------------------------------------------------------------------------------------------------------------------------------------|
| UWBM 118022         | 72° S                  | Coalsack Bluff in the Beardmore Glacier region of the Transantarctic Mountains within 30 meters of the base of the Fremouw Formation         |
| UWBM 118024         | 72° S                  |                                                                                                                                              |
| UWBM 118025         | 72° S                  |                                                                                                                                              |
| UWBM 109750         | 72° S                  |                                                                                                                                              |
| LACM-DI 8115/160747 | 73° S                  | Collinson Ridge in the Shackleton Glacier region of the Transantarctic Mountains within 80 meters of the base of the Fremouw Formation       |
| LACM-DI 8098/160746 | 71° S                  | McIntosh Ridge in the Shackleton Glacier region of the Transantarctic Mountains                                                              |
| UWBM 118026         | 61° S                  | approximately 3 meters below the Permo-Triassic boundary in the Bethulie District, Eastern Cape Province of South Africa                     |
| UWBM 118027         | 58° S                  | 7 meters above the Permo-Triassic Boundary in the Namakwa District, Northern Cape Province of South Africa                                   |
| UWBM 118028         | 62° S                  | 5 meters above a major sandstone package of the basal Katberg Formation in the Nieu Bethesda District, Eastern Cape Province of South Africa |
| SAM-PK-K011603      | 62° S                  | approximately 22 meters above the boundary from the Nieu Bethesda District, Eastern Cape Province of South Africa                            |

Antarctic specimens (above double line) and South African specimens (below double line) with inferred paleolatitude. Institutional abbreviations: **LACM**, Natural History Museum of Los Angeles County, Los Angeles, California; **SAM**, Iziko: South African Museum, Cape Town, South Africa; **UWBM**, University of Washington Burke Museum, Seattle, Washington.
